# Supplementary material
Source: publisher figshare collection journal article supplement (https://sage.figshare.com/ndownloader/files/14530433)
Supplement: Supplementary file 1 [file 14530433]

|                                      |                                                                        |
|--------------------------------------|------------------------------------------------------------------------|
| <b>iTRACK™ 250A</b>                  |                                                                        |
| No. of patients                      | 44 patients, 35 females                                                |
| Age                                  | Min - 46 , max – 96 years , Mean 74,72±12,14 years, median 77,51 years |
| No. of eyes                          | 56 eyes, 29 right eyes                                                 |
| Phacic / Pseudophacic                | 43 phacic / 13 pseudophacic eyes                                       |
|                                      |                                                                        |
| Glaucoma type (n – 56)               | POAG <sup>1</sup> – 39 eyes                                            |
|                                      | LTG <sup>2</sup> – 2 eye                                               |
|                                      | PEX <sup>3</sup> – 8 eyes                                              |
|                                      | OHT <sup>4</sup> – 2 eyes                                              |
|                                      | PDG <sup>5</sup> – 2 eyes                                              |
|                                      | Preperimetric <sup>6</sup> – 3 eyes                                    |
|                                      |                                                                        |
| Baseline IOP (n – 56)                | min 9 – max 58 mmHg, mean 21,92±10,33 mmHg                             |
| IOP lowering agents (n – 56)         | min 0 – max 4, mean 1,91 ± 1,23 IOP agents                             |
| IOP eye drops per day (n – 56)       | min 0 – max 6, mean 2,13 ± 1,51 eye drops                              |
| Visual field mean deviation (n – 56) | min 0,2 – max -32,21 , mean -13,82 ± 12,17                             |
| Cup to disc ratio (n – 56)           | min 0,2 – max 1.0 , mean 0,7 ± 0,2                                     |
|                                      |                                                                        |
| <b>Glaucolight</b>                   |                                                                        |
| No. of patients                      | 36 patients, 25 females                                                |
| Age                                  | Min - 29, max – 91 years , Mean 68,54±14,71 years, median 70 years     |
| No. of eyes                          | 46 eyes, 23 right                                                      |
| Phacic / Pseudophacic                | 37 eyes phacic / 9 pseudophacic                                        |
|                                      |                                                                        |
| Glaucoma type (n – 46)               | POAG <sup>1</sup> – 28 eyes                                            |
|                                      | LTG <sup>2</sup> – 2 eye                                               |
|                                      | PEX <sup>3</sup> – 5 eyes                                              |
|                                      | OHT <sup>4</sup> – 4 eyes                                              |
|                                      | PDG <sup>5</sup> – 3 eyes                                              |
|                                      | Preperimetric <sup>6</sup> – 4 eyes                                    |
|                                      |                                                                        |
| Baseline IOP (n – 56)                | min 11 – max 50 mmHg, mean 21,83±8,02 mmHg                             |
| IOP lowering agents (n – 56)         | min 0 – max 5, mean 2,53 ± 1,13 IOP agents                             |
| IOP eye drops per day (n – 56)       | min 0 – max 8, mean 3,43 ± 1,61 eye drops                              |
| Visual field mean deviation (n – 56) | min 0,6 – max -29,54 , mean -11,82 ± 7,36                              |
| Cup to disc ratio (n – 56)           | min 0,2 – max 1.0 , mean 0,7 ± 0,19                                    |

Table 1. Demographic data of eyes operated with iTRACK™ 250A and Glaucolight

1. POAG – Primary open angle glaucoma
2. LTG – Low tension glaucoma
3. PEX – Pseudoexfoliation glaucoma
4. OHT – Ocular hypertension syndrome
5. PDG – Pigmentary dispersion glaucoma
6. Preperimetric – Preperimetric open angle glaucoma
