# Supplementary material
Source: publisher figshare collection journal article supplement (https://sage.figshare.com/ndownloader/files/14530433)
Supplement: Supplementary file 2 [file 14530433]

| Tests of Between-Subjects Effects                                     |                |                 |                 |            |                |                     |
|-----------------------------------------------------------------------|----------------|-----------------|-----------------|------------|----------------|---------------------|
| Source                                                                | Sum of Squares | DF              | Mean Square     | F          | P              |                     |
| Catheter                                                              | 51,79          | 1               | 51,79           | 1,26       | 0,26           |                     |
| Follow up                                                             | 4589,83        | 5               | 917,96          | 22,44      | <0,001         |                     |
| Catheter*Follow up                                                    | 65,36          | 5               | 13,07           | 0,32       | 0,90           |                     |
| Residual                                                              | 18527,96       | 453             | 40,90           |            |                |                     |
| Pairwise comparisons Follow up - ( <sup>a</sup> Bonferroni corrected) |                |                 |                 |            |                |                     |
| Factors                                                               |                |                 | Mean difference | Std. Error | P <sup>a</sup> | 95% CI <sup>a</sup> |
| A) Baseline                                                           | -              | B) 1st Day      | 9,34            | 0,89       | <0,0001        | 6,69 to 12,00       |
|                                                                       | -              | C) 1-3 Months   | 5,82            | 0,92       | <0,0001        | 3,09 to 8,55        |
|                                                                       | -              | D) 3-6 Months   | 5,94            | 0,97       | <0,0001        | 3,06 to 8,82        |
|                                                                       | -              | E) 9-12 Months  | 6,03            | 1,02       | <0,0001        | 3,00 to 9,06        |
|                                                                       | -              | F) 12-18 Months | 5,98            | 1,50       | 0,0012         | 1,55 to 10,41       |
| B) 1st Day                                                            | -              | A) Baseline     | -9,34           | 0,89       | <0,0001        | -12,00 to -6,69     |
|                                                                       | -              | C) 1-3 Months   | -3,52           | 0,92       | 0,0024         | -6,25 to -0,79      |
|                                                                       | -              | D) 3-6 Months   | -3,39           | 0,97       | 0,0082         | -6,27 to -0,51      |
|                                                                       | -              | E) 9-12 Months  | -3,31           | 1,02       | 0,0201         | -6,33 to -0,28      |
|                                                                       | -              | F) 12-18 Months | -3,36           | 1,50       | 0,38           | -7,78 to 1,06       |
| C) 1-3 Months                                                         | -              | A) Baseline     | -5,82           | 0,92       | <0,0001        | -8,55 to -3,09      |
|                                                                       | -              | B) 1st Day      | 3,52            | 0,92       | 0,0024         | 0,79 to 6,25        |
|                                                                       | -              | D) 3-6 Months   | 0,12            | 0,99       | 1,0000         | -2,82 to 3,07       |
|                                                                       | -              | E) 9-12 Months  | 0,21            | 1,04       | 1,0000         | -2,87 to 3,30       |
|                                                                       | -              | F) 12-18 Months | 0,16            | 1,51       | 1,0000         | -4,31 to 4,63       |
| D) 3-6 Months                                                         | -              | A) Baseline     | -5,94           | 0,97       | <0,0001        | -8,82to -3,06       |
|                                                                       | -              | B) 1st Day      | 3,39            | 0,97       | 0,0082         | 0,51 to 6,27        |
|                                                                       | -              | C) 1-3 Months   | -0,12           | 0,99       | 1,0000         | -3,07 to 2,82       |
|                                                                       | -              | E) 9-12 Months  | 0,08            | 1,09       | 1,0000         | -3,13 to 3,31       |
|                                                                       | -              | F) 12-18 Months | 0,03            | 1,54       | 1,0000         | -4,53 to 4,60       |
| E) 9-12 Months                                                        | -              | A) Baseline     | -6,03           | 1,02       | <0,0001        | -9,06 to -3,00      |
|                                                                       | -              | B) 1st Day      | 3,31            | 1,02       | 0,0201         | 0,28 to 6,33        |
|                                                                       | -              | C) 1-3 Months   | -0,21           | 1,04       | 1,0000         | -3,30 to 2,88       |
|                                                                       | -              | D) 3-6 Months   | -0,08           | 1,09       | 1,0000         | -3,31 to 3,13       |
|                                                                       | -              | F) 12-18 Months | -0,05           | 1,57       | 1,0000         | -4,71 to 4,60       |
| F) 12-18 Months                                                       | -              | A) Baseline     | -5,98           | 1,50       | 0,0012         | -10,41 to -1,55     |
|                                                                       | -              | B) 1st Day      | 3,36            | 1,50       | 0,38           | -1,06 to 7,78       |
|                                                                       | -              | C) 1-3 Months   | -0,16           | 1,51       | 1,0000         | -4,63 to 4,31       |
|                                                                       | -              | D) 3-6 Months   | -0,03           | 1,54       | 1,0000         | -4,60 to 4,53       |
|                                                                       | -              | E) 9-12 Months  | 0,05            | 1,57       | 1,0000         | -4,60 to 4,71       |

Table 3. Results of 2 Ways analysis of variance of two microcather systems (iTRACK™ 250A and Glaucolight) in relation to time.
