# Supplementary material
Source: publisher figshare collection journal article supplement (https://sage.figshare.com/ndownloader/files/14530433)
Supplement: Supplementary file 3 [file 14530433]

| Glaucoma type              | Time           | n  | Mean  | Std. Error | 95% Confidence interval |
|----------------------------|----------------|----|-------|------------|-------------------------|
| POAG <sup>1</sup>          | A) Baseline    | 67 | 21,35 | 0,72       | 19,92 to 22,78          |
|                            | B) 1st Day     | 67 | 11,83 | 0,72       | 10,40 to 13,26          |
|                            | C) 1-3 Months  | 64 | 15,45 | 0,77       | 13,92 to 16,97          |
|                            | D) 3-6 Months  | 53 | 15,66 | 0,85       | 13,98 to 17,33          |
|                            | E) 9-12 Months | 45 | 15,40 | 0,92       | 13,58 to 17,21          |
| LTG <sup>2</sup>           | A) Baseline    | 4  | 10,00 | 6,20       | -2,19 to 22,19          |
|                            | B) 1st Day     | 4  | 7,00  | 6,20       | -5,19 to 19,19          |
|                            | C) 1-3 Months  | 4  | 6,00  | 6,20       | -6,19 to 18,19          |
|                            | D) 3-6 Months  | 4  | 8,00  | 6,20       | -4,19 to 20,19          |
|                            | E) 9-12 Months | 4  | 8,00  | 6,20       | -4,19 to 20,19          |
| PEX <sup>3</sup>           | A) Baseline    | 13 | 23,80 | 1,60       | 20,65 to 26,94          |
|                            | B) 1st Day     | 13 | 14,40 | 1,60       | 11,25 to 17,54          |
|                            | C) 1-3 Months  | 13 | 14,92 | 1,65       | 11,67 to 18,18          |
|                            | D) 3-6 Months  | 12 | 13,00 | 1,79       | 9,48 to 16,51           |
|                            | E) 9-12 Months | 9  | 12,77 | 2,06       | 8,71 to 16,84           |
| PDG <sup>4</sup>           | A) Baseline    | 5  | 23,66 | 3,58       | 16,62 to 30,70          |
|                            | B) 1st Day     | 5  | 14,66 | 3,58       | 7,62 to 21,70           |
|                            | C) 1-3 Months  | 5  | 27,33 | 3,58       | 20,29 to 34,37          |
|                            | D) 3-6 Months  | 5  | 18,00 | 3,58       | 10,96 to 25,03          |
|                            | E) 9-12 Months | 5  | 18,33 | 3,58       | 11,29 to 25,37          |
| OHT <sup>5</sup>           | A) Baseline    | 6  | 28,00 | 2,53       | 23,02 to 32,97          |
|                            | B) 1st Day     | 6  | 16,66 | 2,53       | 11,68 to 21,64          |
|                            | C) 1-3 Months  | 6  | 19,66 | 2,53       | 14,68 to 24,64          |
|                            | D) 3-6 Months  | 5  | 23,20 | 2,77       | 17,74 to 28,65          |
|                            | E) 9-12 Months | 4  | 27,00 | 3,10       | 20,90 to 33,09          |
| Preperimetric <sup>6</sup> | A) Baseline    | 7  | 17,25 | 3,10       | 11,15 to 23,34          |
|                            | B) 1st Day     | 7  | 10,75 | 3,10       | 4,65 to 16,84           |
|                            | C) 1-3 Months  | 7  | 16,25 | 3,10       | 10,15 to 22,34          |
|                            | D) 3-6 Months  | 7  | 17,25 | 3,10       | 11,15 to 23,34          |
|                            | E) 9-12 Months | 5  | 16,33 | 3,58       | 9,29 to 23,37           |

Table 5. Glaucoma type estimated marginal means of IOP following Canaloplasty with two microcatheters (iTRACK™ 250A and Glaucolight) over Follow up in 2 Ways ANOVA

1. POAG – Primary open angle glaucoma
2. LTG – Low tension glaucoma
3. PEX – Pseudoexfoliation glaucoma
4. OHT – Ocular hypertension syndrome
5. PDG – Pigmentary dispersion glaucoma
6. Preperimetric – Preperimetric open angle glaucoma
