# Supplementary material
Source: publisher figshare collection journal article supplement (https://sage.figshare.com/ndownloader/files/14530433)
Supplement: Supplementary file 4 [file 14530433]

| Phacic Eyes - Estimated mean IOP       |              |    |       |            |                         |
|----------------------------------------|--------------|----|-------|------------|-------------------------|
| Time                                   | Catheter     | n  | Mean  | Std. Error | 95% Confidence interval |
| A) Baseline                            | iTRACK™ 250A | 43 | 22,30 | 0,99       | 20,3501 to 24,25        |
|                                        | Glaucolight  | 37 | 23,08 | 1,07       | 20,9765 to 25,18        |
| B) 1st Day                             | iTRACK™ 250A | 43 | 11,72 | 0,99       | 9,7687 to 13,67         |
|                                        | Glaucolight  | 37 | 13,64 | 1,07       | 11,5441 to 15,75        |
| C) 1-3 Months                          | iTRACK™ 250A | 41 | 14,70 | 1,01       | 12,7081 to 16,70        |
|                                        | Glaucolight  | 34 | 17,23 | 1,11       | 15,0399 to 19,43        |
| D) 3-6 Months                          | iTRACK™ 250A | 38 | 15,55 | 1,05       | 13,4759 to 17,62        |
|                                        | Glaucolight  | 24 | 17,37 | 1,32       | 14,7619 to 19,98        |
| E) 9-12 Months                         | iTRACK™ 250A | 31 | 15,80 | 1,16       | 13,5072 to 18,10        |
|                                        | Glaucolight  | 23 | 16,26 | 1,35       | 13,5916 to 18,93        |
| F) 12-18 Months                        | iTRACK™ 250A | 14 | 16,64 | 1,73       | 13,2215 to 20,06        |
|                                        | Glaucolight  | 7  | 16,57 | 2,46       | 11,7329 to 21,41        |
| Pseudophacic eyes – Estimated mean IOP |              |    |       |            |                         |
| Time                                   | Catheter     | n  | Mean  | Std. Error | 95% Confidence interval |
| A) Baseline                            | iTRACK™ 250A | 13 | 20,92 | 1,59       | 17,73 to 24,10          |
|                                        | Glaucolight  | 9  | 16,55 | 1,92       | 12,72 to 20,38          |
| B) 1st Day                             | iTRACK™ 250A | 13 | 12,76 | 1,59       | 9,58 to 15,95           |
|                                        | Glaucolight  | 9  | 11,00 | 1,92       | 7,17 to 14,82           |
| C) 1-3 Months                          | iTRACK™ 250A | 10 | 16,80 | 1,82       | 13,17 to 20,42          |
|                                        | Glaucolight  | 7  | 16,00 | 2,18       | 11,66 to 20,33          |
| D) 3-6 Months                          | iTRACK™ 250A | 9  | 14,11 | 1,92       | 10,28 to 17,93          |
|                                        | Glaucolight  | 7  | 14,00 | 2,18       | 9,66 to 18,33           |
| E) 9-12 Months                         | iTRACK™ 250A | 7  | 14,71 | 2,18       | 10,37 to 19,05          |
|                                        | Glaucolight  | 4  | 15,25 | 2,88       | 9,51 to 20,98           |
| F) 12-18 Months                        | iTRACK™ 250A | 4  | 13,50 | 2,88       | 7,76 to 19,23           |
|                                        | Glaucolight  | 1  | 11,00 | 5,76       | -0,47 to 22,47          |

Table 7. Estimated marginal means of IOP following Canaloplasty ab externo between iTRACK™ 250A and Glaucolight, in phacic and pseudophacic eyes in 2 Ways ANOVA.
