# Supplementary material
Source: publisher figshare collection journal article supplement (https://sage.figshare.com/ndownloader/files/14530433)
Supplement: Supplementary file 5 [file 14530433]

| Source                         | Sum of Squares            | DF  | Mean Square | F          | P                       |
|--------------------------------|---------------------------|-----|-------------|------------|-------------------------|
| Time                           | 2657,53                   | 5   | 531,50      | 13,13      | <0,001                  |
| Phacic 1 ; Pseudophacic 2      | 172,78                    | 1   | 172,78      | 4,27       | 0,039                   |
| Time*Phacic 1 ; Pseudophacic 2 | 173,65                    | 5   | 34,73       | 0,85       | 0,50                    |
| Residual                       | 18332,71                  | 453 | 40,47       |            |                         |
| Time                           | Phacic 1 ; Pseudophacic 2 | n   | Mean        | Std. Error | 95% Confidence interval |
| A) Baseline                    | 1                         | 80  | 22,66       | 0,71       | 21,26 to 24,06          |
|                                | 2                         | 22  | 19,13       | 1,35       | 16,47 to 21,80          |
| B) 1st Day                     | 1                         | 80  | 12,61       | 0,71       | 11,21 to 14,01          |
|                                | 2                         | 22  | 12,04       | 1,35       | 9,38 to 14,71           |
| C) 1-3 Months                  | 1                         | 75  | 15,85       | 0,73       | 14,40 to 17,29          |
|                                | 2                         | 17  | 16,47       | 1,54       | 13,43 to 19,50          |
| D) 3-6 Months                  | 1                         | 62  | 16,25       | 0,80       | 14,67 to 17,84          |
|                                | 2                         | 16  | 14,06       | 1,59       | 10,93 to 17,18          |
| E) 9-12 Months                 | 1                         | 54  | 16,00       | 0,86       | 14,29 to 17,70          |
|                                | 2                         | 11  | 14,90       | 1,91       | 11,13 to 18,67          |
| F) 12-18 Months                | 1                         | 21  | 16,61       | 1,38       | 13,89 to 19,34          |
|                                | 2                         | 5   | 13,00       | 2,84       | 7,40 to 18,59           |

Table 6. Results of 2 Ways analysis of variance between phacic and pseudophacic eyes in relation to time, regardless the microcatheter system used.
