# Supplementary material
Source: publisher figshare collection journal article supplement (https://sage.figshare.com/ndownloader/files/14530433)
Supplement: Supplementary file 6 [file 14530433]

| Tests of Between-Subjects Effects                                    |                 |                      |             |                |                     |
|----------------------------------------------------------------------|-----------------|----------------------|-------------|----------------|---------------------|
| Source                                                               | Sum of Squares  | DF                   | Mean Square | F              | P                   |
| Glaucoma                                                             | 1823,50         | 5                    | 364,70      | 9,48           | <0,001              |
| Follow up                                                            | 657,85          | 4                    | 164,46      | 4,27           | 0,002               |
| Glaucoma*Follow up                                                   | 793,73          | 20                   | 39,68       | 1,03           | 0,42                |
| Residual                                                             | 15729,59        | 409                  | 38,45       |                |                     |
| Pairwise comparisons (Diagnosis) - <sup>a</sup> Bonferroni corrected |                 |                      |             |                |                     |
| Factors                                                              |                 | Mean difference mmHg | Std. Error  | P <sup>a</sup> | 95% CI <sup>a</sup> |
| POAG <sup>1</sup>                                                    | - LTG           | 8,14                 | 2,79        | 0,05           | -0,11 to 16,39      |
|                                                                      | - PEX           | 0,15                 | 0,86        | 1,00           | -2,38 to 2,70       |
|                                                                      | - PDG           | -4,45                | 1,64        | 0,10           | -9,30 to 0,38       |
|                                                                      | - OHT           | -6,96                | 1,26        | <0,0001        | -10,68 to -3,24     |
|                                                                      | - Preperimetric | 0,37                 | 1,47        | 1,00           | -3,98 to 4,73       |
| LTG <sup>2</sup>                                                     | - POAG          | -8,14                | 2,79        | 0,05           | -16,39 to 0,11      |
|                                                                      | - PEX           | -7,9                 | 2,88        | 0,08           | -16,49 to 0,52      |
|                                                                      | - PDG           | -12,60               | 3,20        | 0,0015         | -22,05 to -3,14     |
|                                                                      | - OHT           | -15,10               | 3,02        | <0,0001        | -24,03 to -6,17     |
|                                                                      | - Preperimetric | -7,76                | 3,12        | 0,19           | -16,98 to 1,44      |
| PEX <sup>3</sup>                                                     | - POAG          | -0,15                | 0,86        | 1,00           | -2,70 to 2,38       |
|                                                                      | - LTG           | 7,98                 | 2,88        | 0,08           | -0,52 to 16,49      |
|                                                                      | - PDG           | -4,61                | 1,78        | 0,14           | -9,88 to 0,64       |
|                                                                      | - OHT           | -7,12                | 1,44        | <0,0001        | -11,37 to -2,87     |
|                                                                      | - Preperimetric | 0,21                 | 1,63        | 1,00           | -4,60 to 5,03       |
| PDG <sup>4</sup>                                                     | - POAG          | 4,45                 | 1,64        | 0,10           | -0,38 to 9,30       |
|                                                                      | - LTG           | 12,60                | 3,20        | 0,0015         | 3,14 to 22,05       |
|                                                                      | - PEX           | 4,61                 | 1,78        | 0,14           | -0,64 to 9,88       |
|                                                                      | - OHT           | -2,50                | 2,00        | 1,00           | -8,43 to 3,41       |
|                                                                      | - Preperimetric | 4,83                 | 2,14        | 0,37           | -1,50 to 11,17      |
| OHT <sup>5</sup>                                                     | - POAG          | 6,96                 | 1,26        | <0,0001        | 3,24 to 10,68       |
|                                                                      | - LTG           | 15,10                | 3,02        | <0,0001        | 6,17 to 24,03       |
|                                                                      | - PEX           | 7,12                 | 1,44        | <0,0001        | 2,87 to 11,37       |
|                                                                      | - PDG           | 2,50                 | 2,00        | 1,00           | -3,41 to 8,43       |
|                                                                      | - Preperimetric | 7,34                 | 1,87        | 0,0016         | 1,80 to 12,87       |
| Preperimetric <sup>6</sup>                                           | - POAG          | -0,37                | 1,47        | 1,00           | -4,73 to 3,98       |
|                                                                      | - LTG           | 7,76                 | 3,12        | 0,19           | -1,44 to 16,98      |
|                                                                      | - PEX           | -0,21                | 1,63        | 1,00           | -5,03 to 4,60       |
|                                                                      | - PDG           | -4,83                | 2,14        | 0,37           | -11,17 to 1,50      |
|                                                                      | - OHT           | -7,34                | 1,87        | 0,0016         | -12,87 to -1,80     |

Table 4. Results of 2 Ways analysis of variance of two microcather systems (iTRACK™ 250A and Glaucolight) in relation to glaucoma type

1. POAG – Primary open angle glaucoma
2. LTG – Low tension glaucoma
3. PEX – Pseudoexfoliation glaucoma
4. OHT – Ocular hypertension syndrome
5. PDG – Pigmentary dispersion glaucoma
6. Preperimetric – Preperimetric open angle glaucoma
