# Supplementary material
Source: publisher figshare collection journal article supplement (https://sage.figshare.com/ndownloader/files/14530433)
Supplement: Supplementary file 7 [file 14530433]

| Survival table                               | Factor              |                |                     |                | Overall                        |                |
|----------------------------------------------|---------------------|----------------|---------------------|----------------|--------------------------------|----------------|
|                                              | iTRACK™ 250A        |                | Glaucolight         |                |                                |                |
| Survival time (days)                         | Survival Proportion | Standard Error | Survival Proportion | Standard Error | Survival Proportion            | Standard Error |
| 14                                           | 0,91                | 0,03           | 0,91                | 0,04           | 0,91                           | 0,02           |
| 30                                           | 0,84                | 0,04           | 0,87                | 0,04           | 0,85                           | 0,03           |
| 90                                           | 0,79                | 0,05           | 0,82                | 0,05           | 0,81                           | 0,03           |
| 180                                          | 0,72                | 0,05           | -                   | -              | 0,77                           | 0,04           |
| 360                                          | 0,71                | 0,05           | -                   | -              | 0,76                           | 0,04           |
| Endpoint: Observed n                         | 17,0                |                | 8,0                 |                | a Therapy = 1<br>b Therapy = 0 |                |
| Expected n                                   | 14,0                |                | 11,0                |                |                                |                |
| Observed/Expected                            | 1,21                |                | 0,72                |                |                                |                |
|                                              | Number of events a  |                | Number censored b   |                |                                |                |
| Cases summary                                |                     |                |                     |                |                                |                |
| Factor                                       | N                   | %              | N                   | %              | Total sample size              |                |
| iTRACK™ 250A                                 | 17                  | 28,81          | 42                  | 71,19          | 56                             |                |
| Glaucolight                                  | 8                   | 17,39          | 38                  | 82,61          | 46                             |                |
| Overall                                      | 25                  | 23,81          | 80                  | 76,19          | 102                            |                |
| Comparison of survival curves (Logrank test) |                     |                |                     |                |                                |                |
| Chi-squared                                  |                     | 1,59           |                     |                |                                |                |
| DF                                           |                     | 1              |                     |                |                                |                |
| Significance                                 |                     | P = 0,20       |                     |                |                                |                |

Table 2. Kaplan-Meier survival analysis of two microcatheters iTRACK™ 250A and Glaucolight with introduction of IOP lowering agents.
